# Supplementary material
Source: MDPI journal article supplement (https://www.mdpi.com/2571-550X/6/2/35)
Supplement: s1 [file s1]

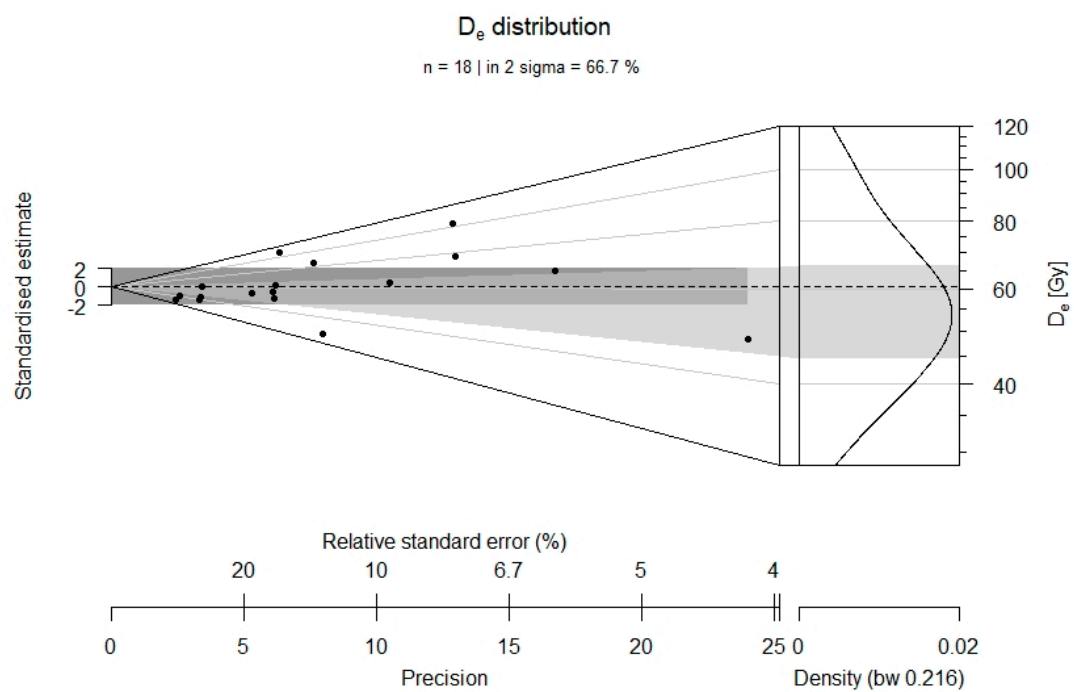

**Figure S1:** Abanico plot of single grain quartz equivalent dose values for sample OSZ 17892.

Table S1 Summary of OSL results.

| Terrace | Lab ID   | Depth (cm) | Water content (%) | U (ppm)     | Th (ppm)  | K (%)     | D* (Gy/ka)  | Grain size (µm) | Age model      | LM-OSL fast component sensitivity (cts/mg/Gy) | LM-OSL fast component ratio Mean±SE | De (Gy)                      | OSL age (ka)              |
|---------|----------|------------|-------------------|-------------|-----------|-----------|-------------|-----------------|----------------|-----------------------------------------------|-------------------------------------|------------------------------|---------------------------|
| T2/2    | OSZ 1787 | 100        | 14±5              | 2.10±0.04   | 8.84±0.21 | 1.38±0.04 | 2.76±0.15   | 4-11            | Mean±SE        | -                                             |                                     | 75.31 ± 0.17                 | 27.3±1.5                  |
|         |          |            |                   |             |           |           |             | 90-300          | MAM            | 753±22                                        | 5.69±0.67                           | 65.46±5.11                   | 28.7±2.5                  |
|         | OSZ 1788 | 200        | 9±5               | 1.83±0.04   | 8.23±0.2  | 1.38±0.04 | 2.74±0.15   | 4-11            | Mean±SE        | -                                             |                                     | 110.81 ± 1.72                | 40.4 ± 2.3                |
|         |          |            |                   |             |           |           |             | 4-11            | Mean±SE        | -                                             |                                     | 102.93 ± 7.36                | 33.5±2.9                  |
|         | OSZ 1789 | 480        | 13±5              | 1.96±0.04   | 8.92±0.22 | 1.82±0.06 | 3.07±0.15   | 90-300          | MAM            | 410±71                                        | 3.67±0.67                           | 67.29±5.15                   | 26.1±2.2                  |
|         |          |            |                   |             |           |           |             | 90-150          | MAM            | 1249±36                                       | 7.42±0.14                           | 90.16 ± 4.37                 | 33.6 ± 1.9                |
|         | OSZ 1790 | 530        | 8±5               | 2.27±0.03   | 9.08±0.16 | 1.57±0.06 | 2.62 ± 0.08 | 90-150          | MAM            | 1249±36                                       | 7.42±0.14                           | 90.16 ± 4.37                 | 33.6 ± 1.9                |
|         | OSZ 1791 | 550        | 1±5               | 0.92 ± 0.02 | 3.27±0.1  | 1.04±0.03 | 1.54 ± 0.09 | 150-220         | MAM            | 802±48                                        | 3.90±0.27                           | 56.79 ± 3.55                 | 36.8 ± 3.1                |
| T2/1    | OSZ 1792 | 570        | 7±5               | 1.56±0.02   | 5.01±0.09 | 1.05±0.04 | 1.71 ± 0.08 | 150-220         | MAM            | 870±217                                       | 4.52±0.61                           | 64.91 ± 3.45<br>59.33 ± 4.8* | 38.0 ± 2.7<br>33.9 ± 3.1* |
|         | OSZ 1793 | 620        | 3±5               | 0.71±0.01   | 2.61±0.05 | 1.02±0.04 | 1.41 ± 0.09 | 220-300         | CAM            | 174±50                                        | 3.28±0.15                           | 51.09 ± 1.53                 | 36.4 ± 2.5                |
|         | OSZ 1794 | 100        | 14±5              | 1.67±0.04   | 7.73±0.19 | 1.39±0.04 | 2.55±0.13   | 4-11<br>90-300  | Mean±SE<br>MAM | -<br>157±14                                   | <br>4.27±0.29                       | 40.29 ± 0.23<br>31.53±2.32   | 15.8±0.8<br>14.8±0.8      |
|         | OSZ 1795 | 200        | 13±5              | 2.19±0.04   | 9.1±0.21  | 1.48±0.05 | 2.44±0.08   | 220-300         | CAM            | 203±25                                        | 3.79±0.24                           | 74.46 ± 1.76                 | 30.5±1.2                  |

\*Results of single-grain measurements
